# Supplementary material for: Onsite cavity enhanced Raman spectrometry for the investigation of gas exchange processes in the Earth's critical zone
Source: Royal Society of Chemistry journal article supplement (doi:10.1039/c7an01149k), 2017-01-01
Supplement: c7an01149k1.pdf [file c7an01149k1.pdf]

**Supplementary Information: Onsite Cavity Enhanced Raman Spectrometry for the Investigation of Gas Exchange Processes in the Earth's Critical Zone**

Anne Sieburg<sup>1</sup>, Tobias Jochum<sup>1</sup>, Susan E. Trumbore<sup>4</sup>, Jürgen Popp<sup>1,2,3</sup>, and Torsten Frosch<sup>1,2,3\*</sup>

<sup>1</sup> Leibniz Institute of Photonic Technology, 07745 Jena, Germany

<sup>2</sup> Friedrich Schiller University, Institute of Physical Chemistry, 07745 Jena, Germany

<sup>3</sup> Friedrich Schiller University, Abbe Center of Photonics, 07745 Jena, Germany

<sup>4</sup> Max Planck Institute for Biogeochemistry, 07745 Jena, Germany

\*corresponding author: [torsten.frosch@uni-jena.de](mailto:torsten.frosch@uni-jena.de), [torsten.frosch@gmx.de](mailto:torsten.frosch@gmx.de)

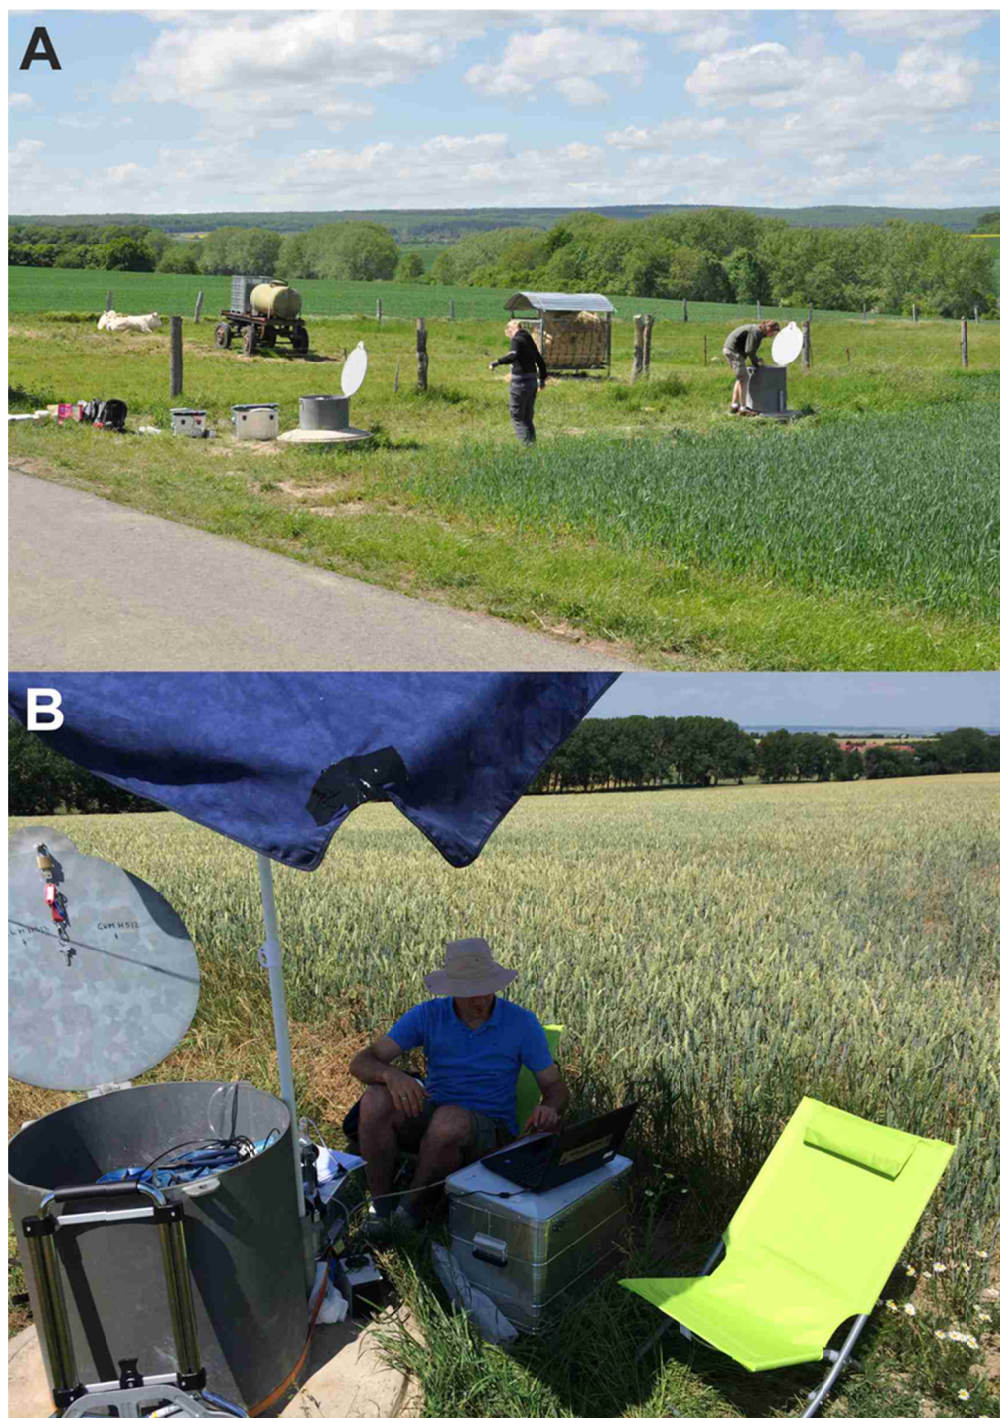

**Figure S1:** Gas monitoring systems were installed at the different locations (A). The depth-profiles of the soil gases were analyzed during several measurement campaigns (B).
